# Supplementary material for: Learning to diagnose X-rays: a neuroscientific study of practice-related activation changes in the prefrontal cortex
Source: publisher site journal article supplement (doi:10.1515/dx-2021-0104), 2021-12-06
Supplement: Supplementary file 1 [file j_dx-2021-0104_suppl.docx]

**Supplementary Materials:**

**Supplementary material 1: Examples of radiological cases developed for use in this study.**


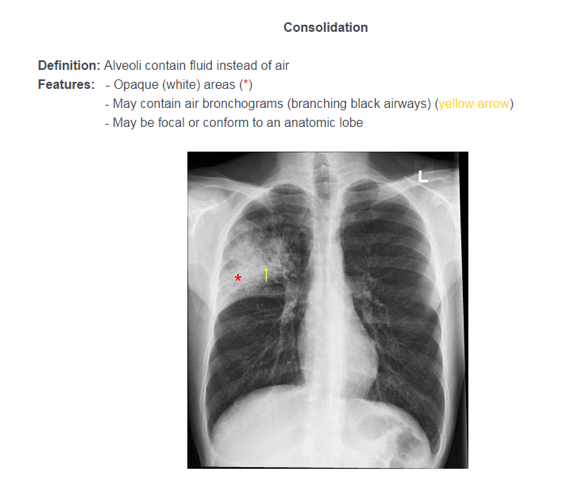


**Appendix 2**

**Supplementary material 2: Example of case presentation during the learning phase with randomised answer options.**


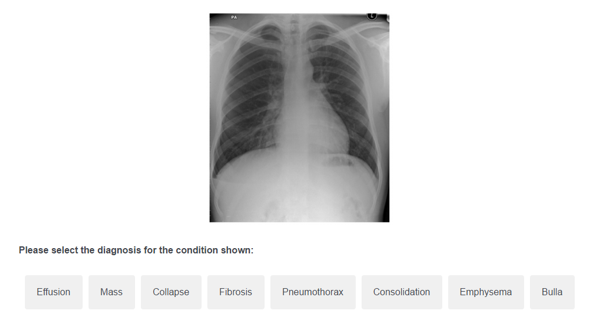


**Supplementary material 3: Overview of all cases used; trained, near-transfer, far-transfer, and untrained cases**

**
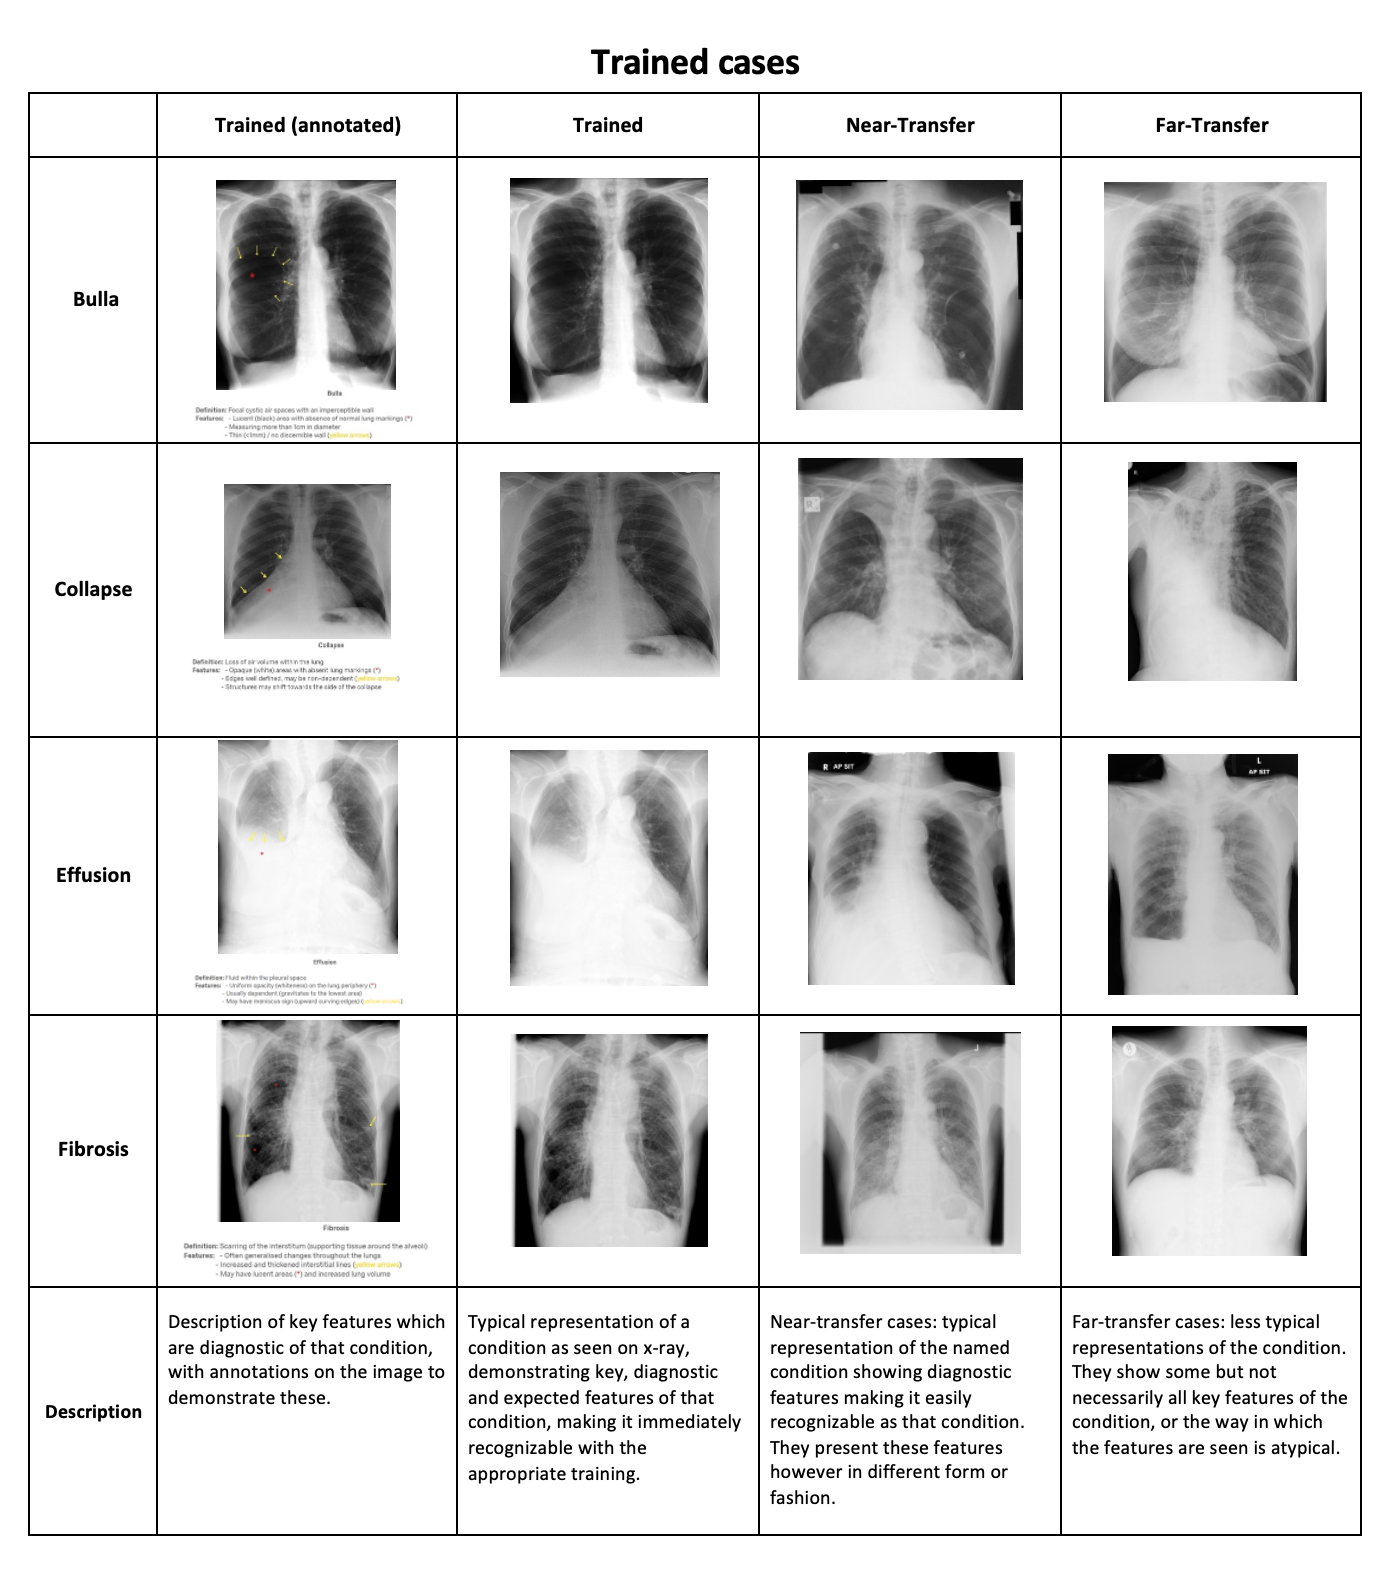
**


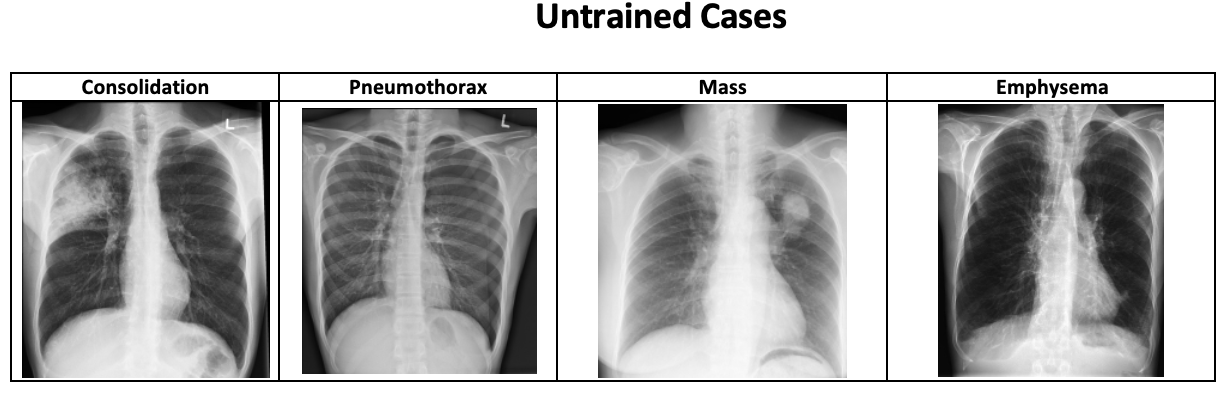


Notes:

1. When presented to participants, images had been standardized so labels such as ‘portable’ and ‘L’ were not seen.
2. These images were selected from a hospital image bank and the key features seen and level of transfer needed was agreed upon by at least 2 radiologists of consultant level or above.

**Supplementary material 4: Overview of the positions of the sources and detectors of the fNIRS cap**


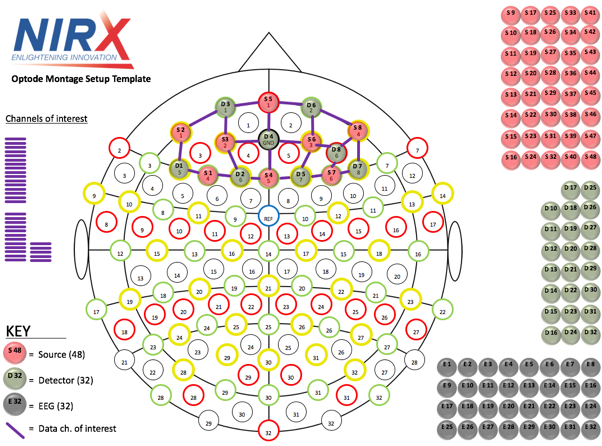


**Supplementary material 5: Contrast analysis and difference scores of oxy-Hb data for each channel between start and end of learning phase.**

Contrast analysis between start and end of learning phase oxy-Hb:


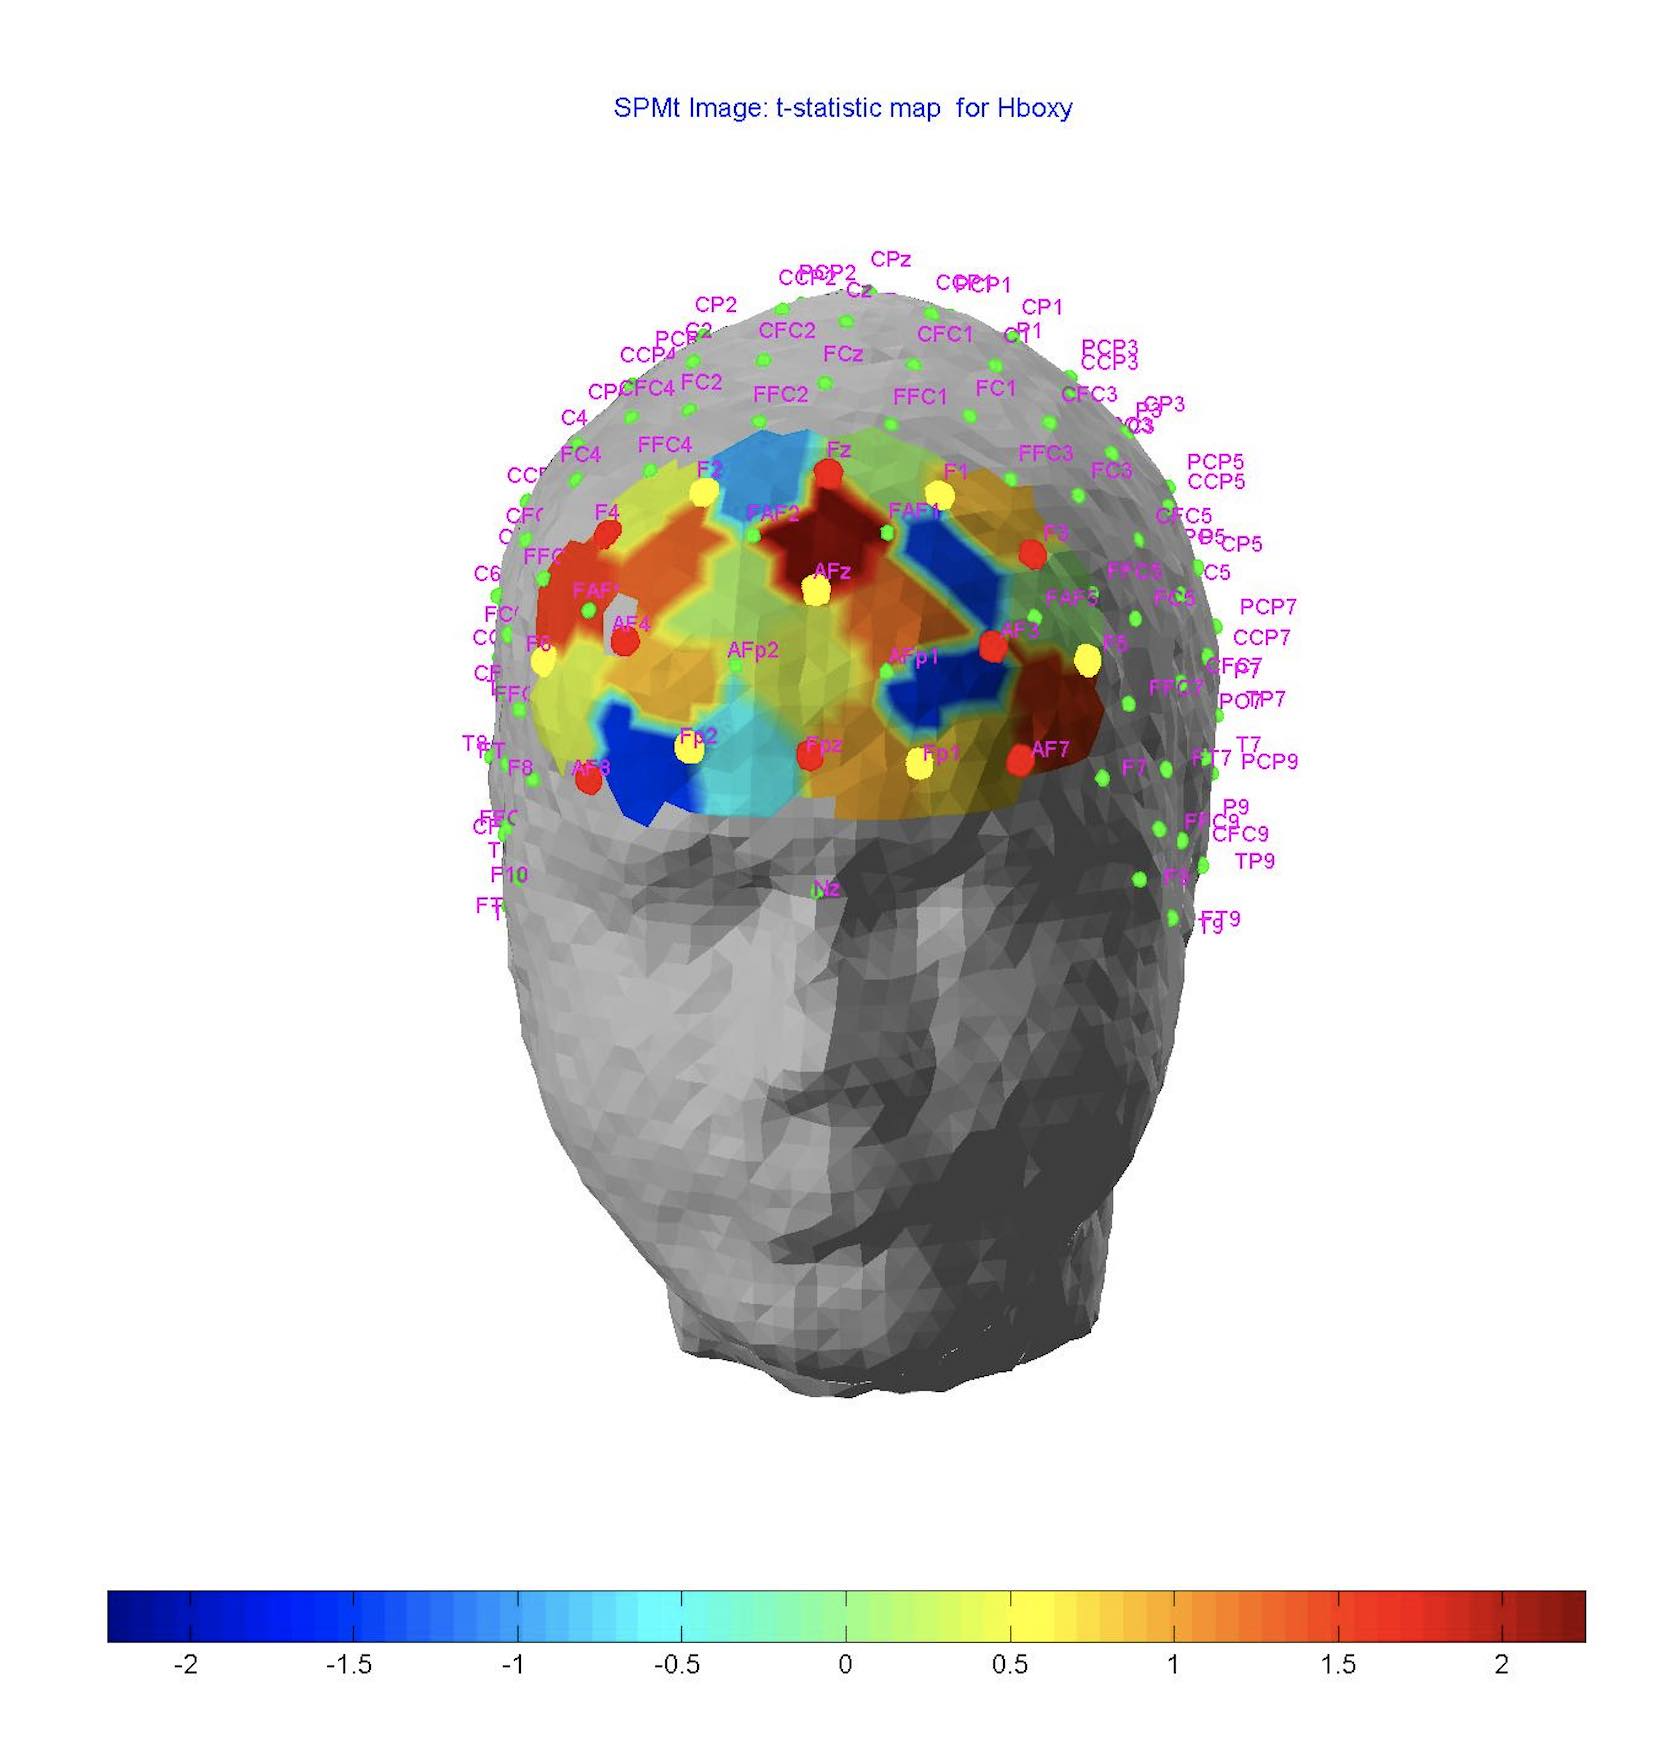


Delta oxy-Hb start and end of learning phase:


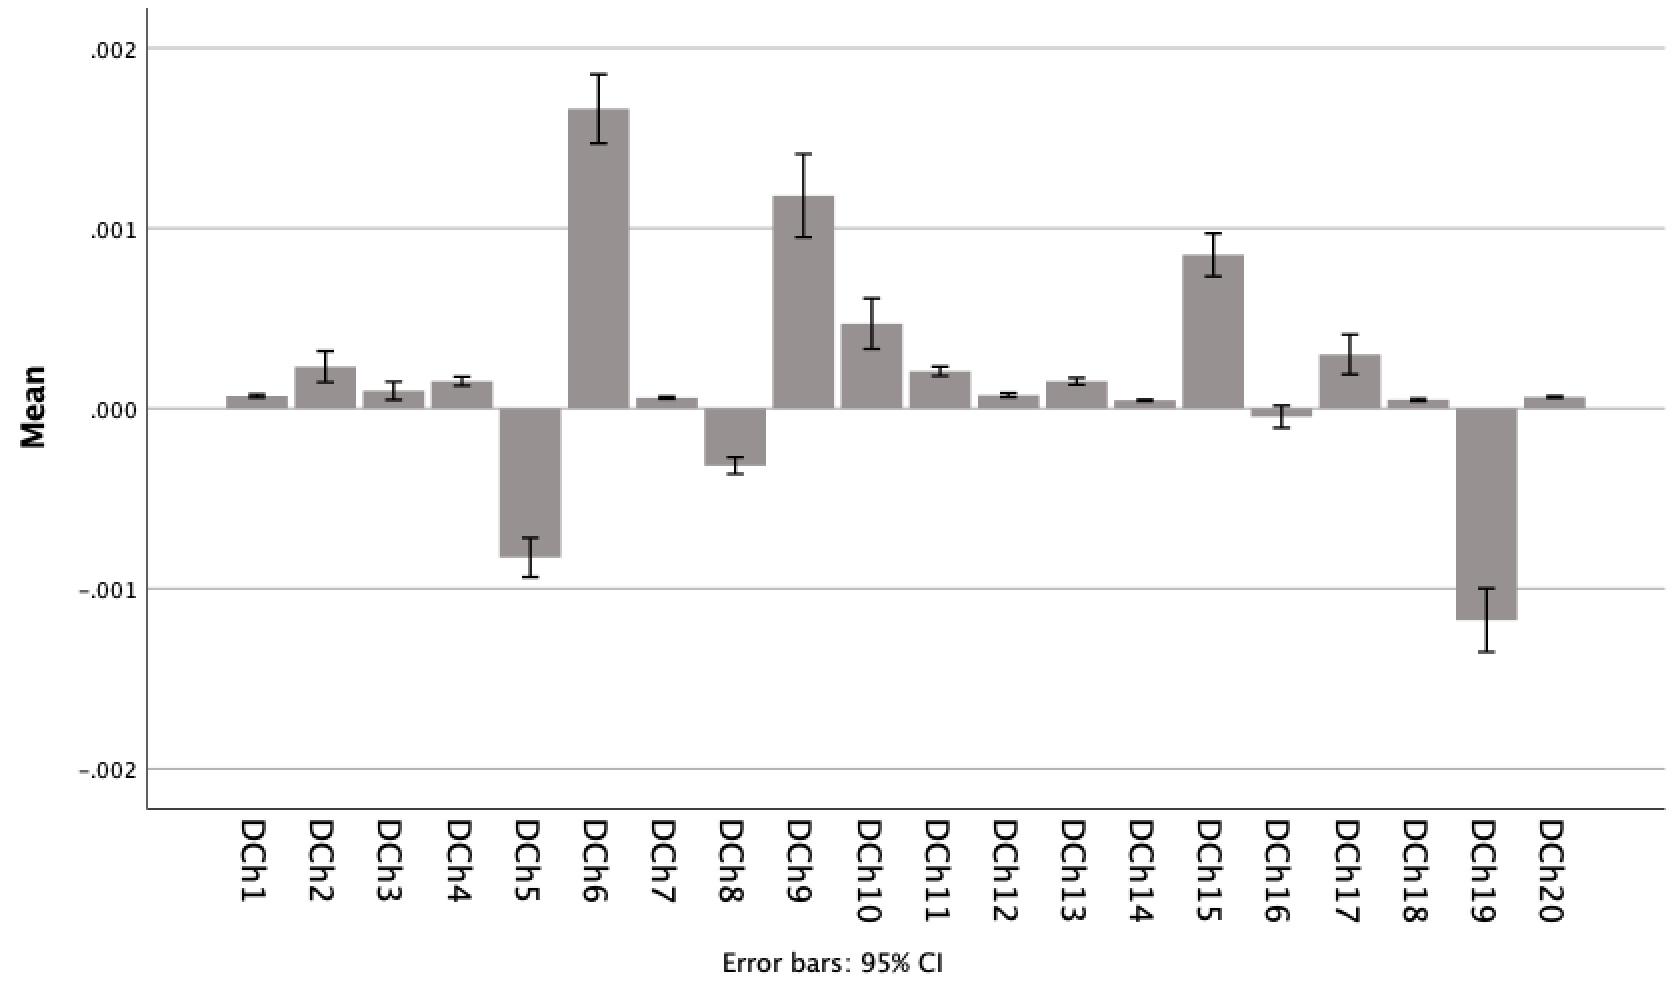


Note: x-axis denotes channels, y-axis denotes amplitude in millimolar mM

**Supplementary material 6: Contrast analysis and comparison of oxy-Hb data for each channel between the trained and untrained cases in the test phase.**

Contrast analysis between untrained and trained cases of test phase oxy-Hb:


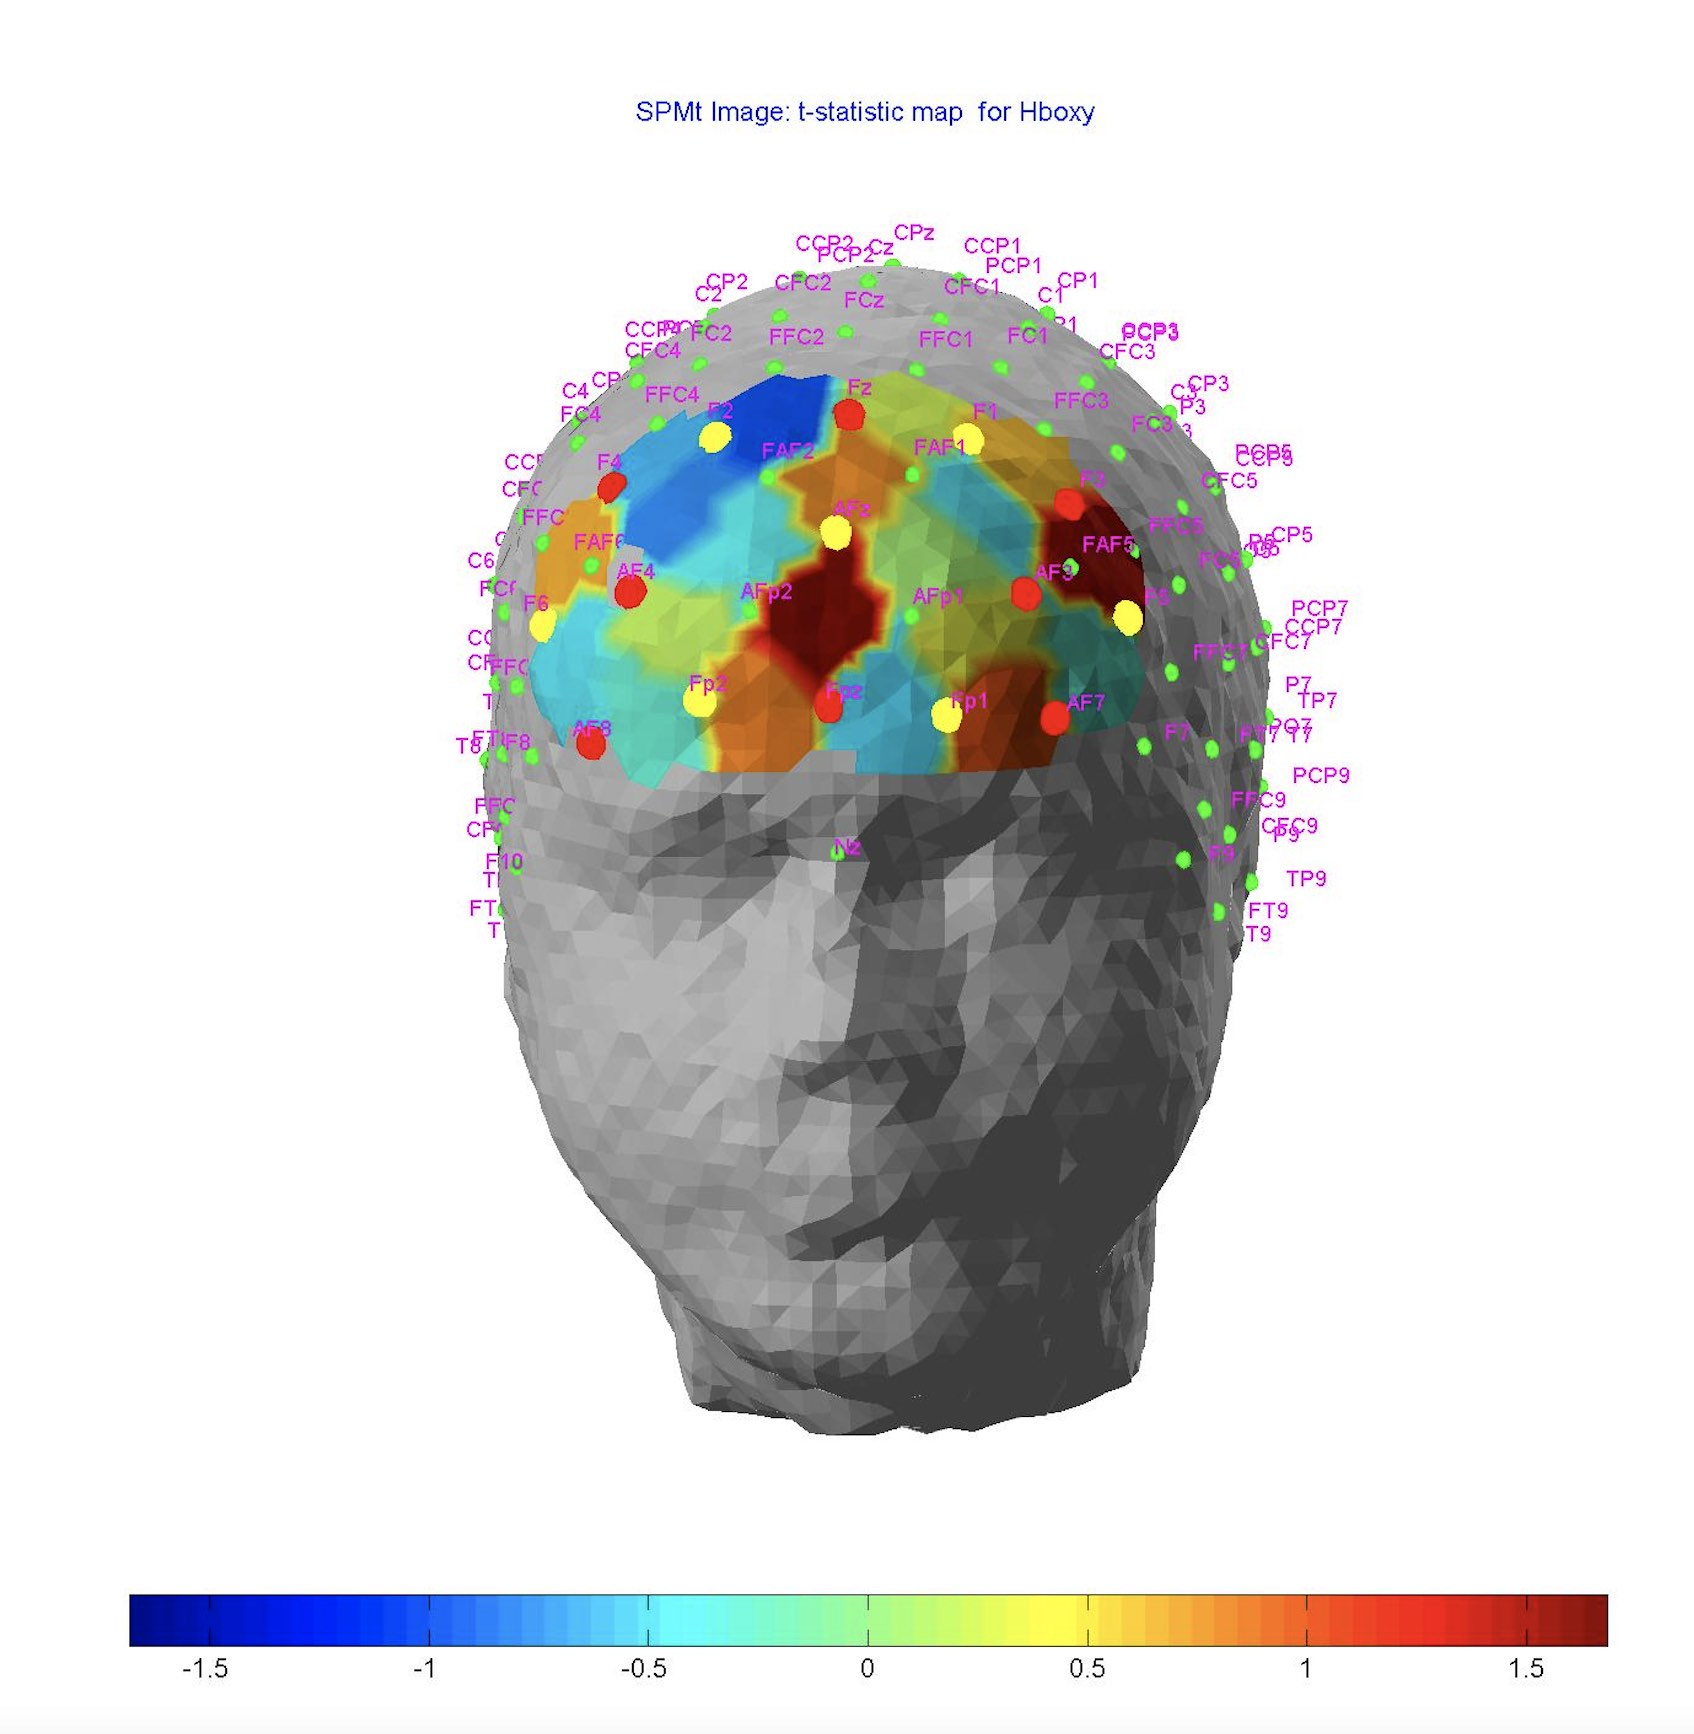


Delta oxy-Hb untainted and trained cases of test phase:


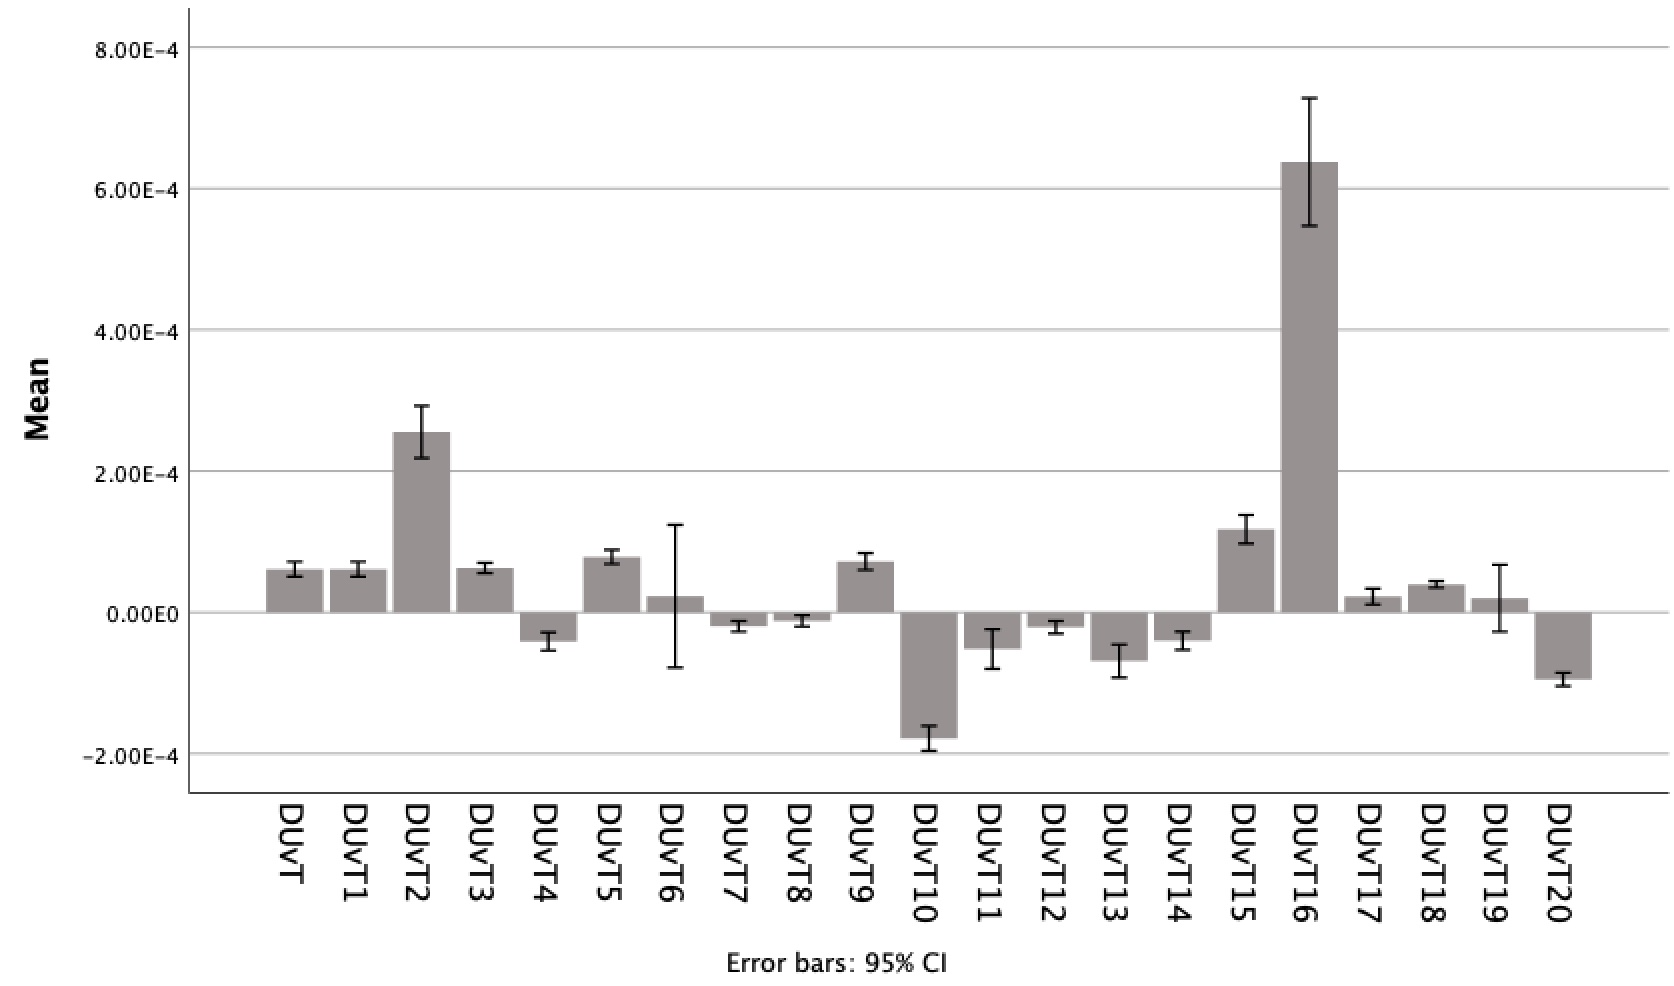


Note: x-axis denotes channels, y-axis denotes amplitude in millimolar mM
